# Supplementary material for: Investigating the causal relationships between excess adiposity and cardiometabolic health in men and women
Source: PubMed Central journal article supplement (PMC9807546; doi:10.1007/s00125-022-05811-5), 2022-10-12
Supplement: 125_2022_5811_MOESM1_ESM.pdf [file 125_2022_5811_MOESM1_ESM.pdf]

## Electronic Supplementary Material (ESM)

### Investigating the causal relationships between excess adiposity and cardiometabolic health in men and women

Pascal M. Mutie<sup>1</sup> (ORCID: 0000-0003-2626-1703), Hugo Pomares-Milan<sup>1</sup>, Naeimeh Atabaki-Pasdar<sup>1</sup>, Daniel Coral<sup>1</sup>, Hugo Fitipaldi<sup>1</sup>, Neli Tsereteli<sup>1</sup>, Juan Fernandez Tajés<sup>1</sup>, Paul W. Franks<sup>1,2</sup> (ORCID: 0000-0002-0520-7604), Giuseppe N. Giordano<sup>1</sup>

#### Table of Contents

|                                                                                                                               |    |
|-------------------------------------------------------------------------------------------------------------------------------|----|
| <i>ESM Tables</i> .....                                                                                                       | 3  |
| ESM Table 1. Codes used for ascertaining disease outcomes in the UKB.....                                                     | 3  |
| ESM Table 2. UKB data field codes for biomarkers used .....                                                                   | 5  |
| ESM Table 3. Sensitivity analyses of causal estimates of BMI on cardiometabolic outcomes in the UKB, combined analysis. ....  | 5  |
| ESM Table 4. Sensitivity analyses of causal estimates of BMI on cardiometabolic outcomes in men and women in the UKB .....    | 6  |
| ESM Table 5. Causal effect estimates of BMI adjusted for WHR on cardiometabolic outcomes .....                                | 7  |
| ESM Table 6. Causal effect estimates of BMI on cardiometabolic outcomes, adjusted for lipid-lowering medication .....         | 8  |
| ESM Table 7. Estimates of causal effects of BMI on cardiometabolic outcomes in pre- and post-menopausal women in the UKB..... | 9  |
| ESM Table 8. Estimates of causal effect of BMI on main cardiometabolic diseases in different groups of men and women.....     | 10 |
| ESM Table 9. Association between cardiometabolic traits and BMI (trait to BMI) .....                                          | 11 |
| ESM Table 10. Prevalence of CAD among obese and non-obese premenopausal women .....                                           | 11 |
| <i>ESM Figures</i> .....                                                                                                      | 12 |
| ESM Figure 1. ....                                                                                                            | 12 |
| ESM Figure 2. ....                                                                                                            | 13 |
| ESM Figure 3. ....                                                                                                            | 14 |
| ESM Figure 4. ....                                                                                                            | 15 |
| ESM Figure 5. ....                                                                                                            | 16 |
| ESM Figure 6. ....                                                                                                            | 17 |
| ESM Figure 7. ....                                                                                                            | 18 |

## **Abbreviations**

|      |                              |
|------|------------------------------|
| 2SLS | Two-stage least-squares      |
| 2SRI | Two-stage residual inclusion |
| CAD  | Coronary artery disease      |
| CKD  | Chronic kidney disease       |
| CMD  | Cardiometabolic disease      |
| DBP  | Diastolic blood pressure     |
| HTN  | Hypertension                 |
| LPA  | Lipoprotein A                |
| MR   | Mendelian randomisation      |
| SBP  | Systolic blood pressure      |

## ESM Tables

| ESM Table 1. Codes used for ascertaining disease outcomes in the UKB |                                          |                                                                                                                                                                                                                                                                                                                  |
|----------------------------------------------------------------------|------------------------------------------|------------------------------------------------------------------------------------------------------------------------------------------------------------------------------------------------------------------------------------------------------------------------------------------------------------------|
| Type 2 diabetes                                                      | ICD10 codes                              | E110, E111, E112, E113, E114, E115, E116, E117, E118, E119, E136, E138, E139, E140, E141, E142, E143, E144, E145, E146, E147, E148, E149, E100, E101, E102, E103, E104, E105, E106, E107, E108, E109, E130, E131, E132, E133                                                                                     |
|                                                                      | ICD9 codes                               | 25000, 25010, 25020, 2503, 2504, 2505, 2506, 2507, 25090, 25009, 25019, 25029, 25099                                                                                                                                                                                                                             |
|                                                                      | Self-reported codes                      | 1220, 1223                                                                                                                                                                                                                                                                                                       |
|                                                                      | Medication codes (Insulin)               | 6153, 6177                                                                                                                                                                                                                                                                                                       |
|                                                                      | Diabetes diagnosed by doctor (interview) | 2443                                                                                                                                                                                                                                                                                                             |
|                                                                      | Age of diagnosis                         | 2976 (excluded possible t1d by age <20yrs)                                                                                                                                                                                                                                                                       |
| CAD                                                                  | ICD10 codes                              | I200, I201, I208, I209, I210, I211, I212, I213, I214, I219, I220, I221, I228, I229, I231, I232, I233, I236, I238, I240, I241, I248, I249, I250, I251, I252, I253, I254, I255, I256, I258, I259                                                                                                                   |
|                                                                      | ICD9 codes                               | 4109, 4119, 4129, 4140, 4141, 4141, 4149                                                                                                                                                                                                                                                                         |
|                                                                      | Self-reported codes                      | 1071                                                                                                                                                                                                                                                                                                             |
|                                                                      | OPCS4                                    | K401, K402, K403, K404, K409, K411, K412, K413, K414, K424, K431, K433, K439, K441, K442, K449, K451, K452, K453, K454, K455, K456, K458, K459, K461, K462, K463, K464, K469, K472, K481, K482, K488, K491, K492, K493, K494, K498, K499, K501, K502, K503, K504, K508, K509, K751, K752, K753, K754, K758, K759 |
|                                                                      | OPCS4 self-reported                      | 1070, 1095, 1523                                                                                                                                                                                                                                                                                                 |
|                                                                      | Vascular disease diagnosed by doctor     | 6150                                                                                                                                                                                                                                                                                                             |
| Stroke                                                               | ICD10 codes                              | I600, I601, I602, I603, I604, I605, I606, I607, I608, I609, I610, I611, I612, I613, I614, I615, I616, I618, I619, I620, I621, I629, I630, I631, I632, I633, I634, I635, I636, I638, I639, I650, I651, I652, I653, I658, I659, I660, I661, I662, I663, I664, I668, I669, I64, I693, I694, H341, H342, H348, H349  |
|                                                                      | ICD9 codes                               | 4309, 4319, 4340, 4341, 4349, 4369                                                                                                                                                                                                                                                                               |
|                                                                      | Self-reported codes                      | 1081, 1583, 1491, 1086                                                                                                                                                                                                                                                                                           |
|                                                                      | OPCS4                                    | A052, A053, A054, A103, L343, L353, L354                                                                                                                                                                                                                                                                         |
|                                                                      | OPCS4 self-reported                      | 1468                                                                                                                                                                                                                                                                                                             |

|                      |                                      |                                                                                                |
|----------------------|--------------------------------------|------------------------------------------------------------------------------------------------|
|                      | Vascular disease diagnosed by doctor | 6150                                                                                           |
| Hypertension         | ICD10 codes                          | I10, I110, I119, I120, I129, O10, O11, I130, I131, I132, I139, I150, I151, I152, I159          |
|                      | ICD9 codes                           | 4010,4011,4019,4020,4021,4029,4030,4031,4039,4040,4041,4049,4050,4051,4059                     |
|                      | Self-reported codes                  | 1065,1072                                                                                      |
|                      | Vascular disease diagnosed by doctor | 6150                                                                                           |
|                      | Medication (BP medication)           | 6153,6177                                                                                      |
| Kidney disease (CKD) | ICD10 codes                          | N180, N181, N182, N183, N184, N185, N188, N189, N19                                            |
|                      | ICD9 codes                           | 5859                                                                                           |
|                      | Self-reported codes                  | 1193, 1192,1194                                                                                |
|                      | OPCS4                                | M012, M013, M014, M015, M018, M019, M172, M174, L741, L742, L743, L744, L745, L746, L748, L749 |
|                      | OPCS4 self-reported                  | 1476, 1580,1581,1582,1195                                                                      |
|                      |                                      |                                                                                                |

| ESM Table 2. UKB data field codes for biomarkers used |                       |
|-------------------------------------------------------|-----------------------|
| Biomarker                                             | UK biobank data field |
| Fasting glucose                                       | 30740                 |
| HbA1c                                                 | 30750                 |
| Triglyceride levels                                   | 30870                 |
| Total cholesterol                                     | 30690                 |
| HDL                                                   | 30760                 |
| LDL                                                   | 30780                 |
| LPA                                                   | 30790                 |
| Urea                                                  | 30670                 |
| SBP                                                   | 4080                  |
| DBP                                                   | 4079                  |

**ESM Table 3.** Sensitivity analyses of causal estimates of BMI on cardiometabolic outcomes in the UKB, combined analysis.

| Trait             | 2SLS-RI              |                        | G estimator          |                        |
|-------------------|----------------------|------------------------|----------------------|------------------------|
|                   | OR/ $\beta$ (95% CI) | P-value                | OR/ $\beta$ (95% CI) | P-value                |
| CAD               | 1.19(1.07,1.32)      | 1.26x10 <sup>-3</sup>  | 1.19(1.07,1.32)      | 8.12 x10 <sup>-4</sup> |
| Type 2 diabetes   | 3.05(2.67,3.48)      | 8.77x10 <sup>-62</sup> | 3.08(2.68,3.55)      | 2.68x10 <sup>-55</sup> |
| Stroke            | 1.08(0.92,1.27)      | 0.36                   | 1.08(0.92,1.27)      | 0.34                   |
| CKD               | 1.07(0.67,1.71)      | 0.77                   | 1.07(0.68,1.70)      | 0.76                   |
| Hypertension      | 1.54(1.45,1.64)      | 1.01x10 <sup>-41</sup> | 1.55(1.45,1.64)      | 1.71x10 <sup>-42</sup> |
| <b>Biomarkers</b> |                      |                        |                      |                        |
| DBP               | 0.16(0.12,0.19)      | 2.23x10 <sup>-22</sup> | 1.60(0.82,2.39)      | 6.12x10 <sup>-5</sup>  |
| SBP               | 0.09(0.06,0.12)      | 5.57x10 <sup>-8</sup>  | 1.63(0.29,2.97)      | 0.02                   |
| Glucose           | 0.16(0.13,0.20)      | 2.76x10 <sup>-21</sup> | 0.18(0.12,0.25)      | 4.84x10 <sup>-8</sup>  |
| HBA <sub>1c</sub> | 0.22(0.19,0.26)      | 7.27x10 <sup>-39</sup> | 1.43(1.14,1.72)      | 2.88x10 <sup>-22</sup> |
| Cholesterol       | -0.18(-0.21,-0.14)   | 9.59x10 <sup>-25</sup> | -0.21(-0.25,-0.16)   | 1.51x10 <sup>-16</sup> |
| HDL               | -0.26(-0.3,-0.22)    | 2.91x10 <sup>-42</sup> | -0.10(-0.12,-0.08)   | 2.96x10 <sup>-25</sup> |
| LDL               | -0.10(-0.14,-0.07)   | 1.15x10 <sup>-9</sup>  | -0.09(-0.13,-0.06)   | 1.65x10 <sup>-7</sup>  |
| Triacylglycerol   | 0.13(0.09,0.16)      | 1.09x10 <sup>-14</sup> | 0.13(0.10,0.16)      | 8.70x10 <sup>-17</sup> |
| LPA               | 0.02(-0.02,0.05)     | 0.31                   | 0.75(-0.99,2.50)     | 0.40                   |
| Urea              | 0.05(0.01,0.08)      | 0.01                   | 0.07(0.01,0.12)      | 0.02                   |

Effect sizes for CMDs are represented as OR. Effect sizes for biomarkers are represented as  $\beta$  SD units

| ESM Table 4. Sensitivity analyses of causal estimates of BMI on cardiometabolic outcomes in men and women in the UKB |                      |                        |                      |                        |                      |                        |                      |                        |
|----------------------------------------------------------------------------------------------------------------------|----------------------|------------------------|----------------------|------------------------|----------------------|------------------------|----------------------|------------------------|
| Trait                                                                                                                | 2SLS-RI              |                        |                      |                        | G estimator          |                        |                      |                        |
|                                                                                                                      | Men                  |                        | Women                |                        | Men                  |                        | Women                |                        |
| CMDs                                                                                                                 | OR/ $\beta$ (95% CI) | <i>p</i> value         | OR/ $\beta$ (95% CI) | <i>p</i> value         | OR/ $\beta$ (95% CI) | <i>p</i> value         | OR/ $\beta$ (95% CI) | <i>p</i> value         |
| CAD                                                                                                                  | 1.30(1.15,1.47)      | 3.42x10 <sup>-5</sup>  | 0.96(0.79,1.16)      | 0.65                   | 1.30(1.15,1.47)      | 3.13x10 <sup>-5</sup>  | 0.98(0.82,1.16)      | 0.78                   |
| Type 2 diabetes                                                                                                      | 2.90(2.46,3.41)      | 7.13x10 <sup>-37</sup> | 3.30(2.66,4.10)      | 4.59x10 <sup>-27</sup> | 2.91(2.46,3.45)      | 4.85x10 <sup>-35</sup> | 3.35(2.63,4.26)      | 7.34x10 <sup>-23</sup> |
| Stroke                                                                                                               | 1.14(0.92,1.40)      | 0.23                   | 0.99(0.76,1.29)      | 0.94                   | 1.14(0.92,1.40)      | 0.23                   | 1.00(0.78,1.28)      | 0.98                   |
| CKD                                                                                                                  | 1.13(0.62,2.05)      | 0.70                   | 0.98(0.47,2.04)      | 0.96                   | 1.13(0.62,2.05)      | 0.70                   | 0.99(0.50,1.97)      | 0.97                   |
| Hypertension                                                                                                         | 1.53(1.40,1.67)      | 3.81x10 <sup>-22</sup> | 1.56(1.42,1.71)      | 5.23x10 <sup>-21</sup> | 1.53(1.41,1.67)      | 2.61x10 <sup>-22</sup> | 1.56(1.42,1.71)      | 1.21x10 <sup>-21</sup> |
| Biomarkers                                                                                                           |                      |                        |                      |                        |                      |                        |                      |                        |
| DBP                                                                                                                  | 0.14(0.09,0.18)      | 2.80x10 <sup>-9</sup>  | 0.17(0.13,0.21)      | 9.19x10 <sup>-15</sup> | 1.63(0.52,2.75)      | 4.12x10 <sup>-3</sup>  | 1.52(0.42,2.61)      | 6.51 x10 <sup>-3</sup> |
| SBP                                                                                                                  | 0.11(0.06,0.15)      | 1.03x10 <sup>-5</sup>  | 0.07(0.03,0.12)      | 1.34x10 <sup>-3</sup>  | 2.27(0.38,4.16)      | 0.02                   | 0.95(-0.94,2.84)     | 0.32                   |
| Glucose                                                                                                              | 0.18(0.13,0.23)      | 7.43x10 <sup>-13</sup> | 0.15(0.1,0.19)       | 3.35x10 <sup>-9</sup>  | 0.25(0.16,0.35)      | 2.31x10 <sup>-7</sup>  | 0.12(0.03,0.21)      | 0.01                   |
| HBA <sub>1c</sub>                                                                                                    | 0.23(0.18,0.27)      | 1.34x10 <sup>-20</sup> | 0.22(0.17,0.27)      | 3.32x10 <sup>-20</sup> | 1.62(1.18,2.05)      | 2.10x10 <sup>-13</sup> | 1.26(0.87,1.65)      | 1.98x10 <sup>-10</sup> |
| Cholesterol                                                                                                          | -0.23(-0.28,-0.18)   | 1.23x10 <sup>-19</sup> | -0.13(-0.18,-0.08)   | 5.30x10 <sup>-8</sup>  | -0.23(-0.3,-0.17)    | 9.12x10 <sup>-12</sup> | -0.17(-0.24,-0.1)    | 9.30x10 <sup>-7</sup>  |
| HDL                                                                                                                  | -0.32(-0.37,-0.27)   | 5.17x10 <sup>-38</sup> | -0.25(-0.3,-0.20)    | 7.22x10 <sup>-24</sup> | -0.1(-0.12,-0.07)    | 5.92x10 <sup>-16</sup> | -0.11(-0.14,-0.08)   | 7.30x10 <sup>-13</sup> |
| LDL <sup>†</sup>                                                                                                     | -0.17(-0.21,-0.12)   | 4.59x10 <sup>-11</sup> | -0.05(-0.09,0.01)    | 0.05                   | -0.12(-0.17,-0.08)   | 4.10x10 <sup>-7</sup>  | -0.06(-0.11,-0.01)   | 0.02                   |
| Triacylglycerol                                                                                                      | 0.14(0.09,0.18)      | 3.46x10 <sup>-9</sup>  | 0.11(0.07,0.16)      | 8.15x10 <sup>-7</sup>  | 0.17(0.12,0.21)      | 2.81x10 <sup>-11</sup> | 0.09(0.06,0.13)      | 5.63x10 <sup>-7</sup>  |
| LPA                                                                                                                  | 0.01(-0.05,0.05)     | 0.99                   | 0.04(-0.01,0.09)     | 0.16                   | -0.08(-2.56,2.4)     | 0.95                   | 1.52(-0.93,3.97)     | 0.22                   |
| Urea                                                                                                                 | 0.02(-0.03,0.07)     | 0.36                   | 0.06(0.02,0.11)      | 9.10x10 <sup>-3</sup>  | 0.06(-0.02,0.14)     | 0.17                   | 0.07(0.00,0.14)      | 0.06                   |

Effect sizes for CMDs are represented as OR. Effect sizes for biomarkers are represented as  $\beta$  SD units

| ESM Table 5. Causal effect estimates of BMI adjusted for WHR on cardiometabolic outcomes |                      |                         |                      |                         |                      |                         |
|------------------------------------------------------------------------------------------|----------------------|-------------------------|----------------------|-------------------------|----------------------|-------------------------|
| Trait                                                                                    | Combined             |                         | Men                  |                         | Women                |                         |
| CMDs                                                                                     | OR/ $\beta$ (95% CI) | <i>p</i> value          | OR/ $\beta$ (95% CI) | <i>p</i> value          | OR/ $\beta$ (95% CI) | <i>p</i> value          |
| CAD                                                                                      | 1.22(1.09, 1.37)     | 7.53x10 <sup>-4</sup>   | 1.36(1.18, 1.57)     | 3.13 x10 <sup>-5</sup>  | 0.97(0.79, 1.19)     | 0.78                    |
| Type 2 diabetes                                                                          | 3.56(3.07, 4.12)     | 7.92 x10 <sup>-65</sup> | 3.4(2.81, 4.12)      | 2.78 x10 <sup>-36</sup> | 3.87(3.07, 4.88)     | 2.29 x10 <sup>-30</sup> |
| Stroke                                                                                   | 1.09(0.91, 1.31)     | 0.34                    | 1.16(0.91, 1.48)     | 0.23                    | 1(0.76, 1.33)        | 1.00                    |
| CKD                                                                                      | 1.1(0.65, 1.85)      | 0.72                    | 1.18(0.59, 2.37)     | 0.65                    | 0.99(0.45, 2.16)     | 0.97                    |
| Hypertension                                                                             | 1.6(1.5, 1.71)       | 3.76 x10 <sup>-42</sup> | 1.61(1.46, 1.77)     | 1.35 x10 <sup>-21</sup> | 1.6(1.46, 1.76)      | 4.53 x10 <sup>-22</sup> |
| Biomarkers                                                                               |                      |                         |                      |                         |                      |                         |
| DBP                                                                                      | 0.17(0.13, 0.21)     | 1.93x10 <sup>-19</sup>  | 0.16(0.1, 0.21)      | 4.77 x10 <sup>-8</sup>  | 0.18(0.13, 0.23)     | 1.67 x10 <sup>-12</sup> |
| SBP                                                                                      | 0.1(0.06, 0.14)      | 1.63 x10 <sup>-7</sup>  | 0.12(0.06, 0.18)     | 3.21 x10 <sup>-5</sup>  | 0.08(0.03, 0.13)     | 1.49 x10 <sup>-3</sup>  |
| Glucose                                                                                  | 0.19(0.15, 0.22)     | 3.86 x10 <sup>-21</sup> | 0.21(0.15, 0.27)     | 3.43 x10 <sup>-12</sup> | 0.16(0.11, 0.21)     | 1.54 x10 <sup>-9</sup>  |
| HBA <sub>1c</sub>                                                                        | 0.25(0.21, 0.29)     | 4.53 x10 <sup>-34</sup> | 0.26(0.2, 0.32)      | 2.26 x10 <sup>-17</sup> | 0.24(0.18, 0.29)     | 3.61 x10 <sup>-18</sup> |
| Cholesterol                                                                              | -0.2(-0.24, -0.16)   | 6.39 x10 <sup>-26</sup> | -0.27(-0.33, -0.21)  | 5.52 x10 <sup>-19</sup> | -0.14(-0.19, -0.09)  | 2.33 x10 <sup>-8</sup>  |
| HDL                                                                                      | -0.29(-0.34, -0.24)  | 2.34 x10 <sup>-34</sup> | -0.37(-0.44, -0.3)   | 4.06 x10 <sup>-26</sup> | -0.28(-0.34, -0.22)  | 2.70 x10 <sup>-19</sup> |
| LDL                                                                                      | -0.12(-0.15, -0.08)  | 2.88 x10 <sup>-10</sup> | -0.19(-0.25, -0.13)  | 6.63 x10 <sup>-11</sup> | -0.05(-0.1, 0)       | 0.04                    |
| Triacylglycerol                                                                          | 0.14(0.1, 0.18)      | 3.70 x10 <sup>-14</sup> | 0.16(0.1, 0.21)      | 2.85 x10 <sup>-8</sup>  | 0.13(0.08, 0.17)     | 7.41 x10 <sup>-7</sup>  |
| LPA                                                                                      | 0.02(-0.02, 0.06)    | 0.29                    | 0(-0.06, 0.06)       | 0.99                    | 0.04(-0.01, 0.09)    | 0.16                    |
| Urea                                                                                     | 0.05(0.01, 0.09)     | 0.01                    | 0.03(-0.03, 0.08)    | 0.36                    | 0.07(0.02, 0.12)     | 7.28 x10 <sup>-3</sup>  |

Effect sizes for CMDs are represented as OR. Effect sizes for biomarkers are represented as  $\beta$  SD units

ESM Table 6. Causal effect estimates of BMI on cardiometabolic outcomes, adjusted for lipid-lowering medication

| Trait             | Combined             |                         | Men                  |                         | Women                |                         |
|-------------------|----------------------|-------------------------|----------------------|-------------------------|----------------------|-------------------------|
|                   | OR/ $\beta$ (95% CI) | <i>p</i> value          | OR/ $\beta$ (95% CI) | <i>p</i> value          | OR/ $\beta$ (95% CI) | <i>p</i> value          |
| CMDs              |                      |                         |                      |                         |                      |                         |
| CAD               | 1.2(1.08, 1.33)      | 7.07x10 <sup>-4</sup>   | 1.31(1.15, 1.48)     | 2.81 x10 <sup>-5</sup>  | 0.97(0.81, 1.17)     | 0.78                    |
| Type 2 diabetes   | 3.12(2.74, 3.55)     | 4.68 x10 <sup>-66</sup> | 2.88(2.45, 3.39)     | 2.50 x10 <sup>-37</sup> | 3.49(2.82, 4.32)     | 1.20 x10 <sup>-30</sup> |
| Stroke            | 1.08(0.92, 1.28)     | 0.34                    | 1.14(0.92, 1.41)     | 0.23                    | 1(0.77, 1.29)        | 0.98                    |
| CKD               | 1.08(0.67, 1.72)     | 0.76                    | 1.13(0.62, 2.07)     | 0.69                    | 0.99(0.48, 2.05)     | 0.97                    |
| Hypertension      | 1.53(1.44, 1.62)     | 7.42 x10 <sup>-43</sup> | 1.51(1.39, 1.64)     | 5.18 x10 <sup>-22</sup> | 1.55(1.42, 1.69)     | 2.27 x10 <sup>-22</sup> |
| Biomarkers        |                      |                         |                      |                         |                      |                         |
| Glucose           | 0.17(0.13, 0.2)      | 2.33 x10 <sup>-20</sup> | 0.18(0.13, 0.23)     | 5.00 x10 <sup>-12</sup> | 0.15(0.1, 0.2)       | 5.47 x10 <sup>-9</sup>  |
| HBA <sub>1c</sub> | 0.22(0.19, 0.26)     | 7.24 x10 <sup>-35</sup> | 0.23(0.18, 0.28)     | 2.58 x10 <sup>-18</sup> | 0.22(0.17, 0.27)     | 1.89 x10 <sup>-18</sup> |
| HDL               | -0.26(-0.3, -0.22)   | 1.79x10 <sup>-35</sup>  | -0.32(-0.38, -0.27)  | 3.16 x10 <sup>-28</sup> | -0.25(-0.31, -0.2)   | 2.56 x10 <sup>-19</sup> |
| LDL               | -0.11(-0.14, -0.07)  | 6.91 x10 <sup>-10</sup> | -0.17(-0.22, -0.12)  | 3.93 x10 <sup>-11</sup> | -0.05(-0.09, 0)      | 0.05                    |
| Triacylglycerol   | 0.13(0.09, 0.16)     | 1.49 x10 <sup>-13</sup> | 0.14(0.09, 0.19)     | 3.05 x10 <sup>-8</sup>  | 0.12(0.07, 0.16)     | 1.42 x10 <sup>-6</sup>  |
| LPA               | 0.02(-0.02, 0.05)    | 0.30                    | 0(-0.05, 0.05)       | 1.00                    | 0.04(-0.01, 0.09)    | 0.16                    |
| DBP               | 0.15(0.12, 0.19)     | 4.95 x10 <sup>-19</sup> | 0.14(0.09, 0.18)     | 3.93 x10 <sup>-8</sup>  | 0.17(0.12, 0.22)     | 4.23 x10 <sup>-12</sup> |
| SBP               | 0.09(0.06, 0.12)     | 1.79 x10 <sup>-7</sup>  | 0.11(0.06, 0.15)     | 2.37 x10 <sup>-5</sup>  | 0.07(0.03, 0.12)     | 2.11 x10 <sup>-3</sup>  |
| Urea              | 0.05(0.01, 0.08)     | 9.54x10 <sup>-3</sup>   | 0.02(-0.03, 0.07)    | 0.37                    | 0.06(0.02, 0.11)     | 7.88 x10 <sup>-3</sup>  |
| Cholesterol       | -0.18(-0.21, -0.15)  | 6.05 x10 <sup>-25</sup> | -0.23(-0.29, -0.18)  | 3.00 x10 <sup>-19</sup> | -0.13(-0.18, -0.08)  | 3.70 x10 <sup>-8</sup>  |

Effect sizes for CMDs are represented as OR. Effect sizes for biomarkers are represented as  $\beta$  SD units



| ESM Table 7. Estimates of causal effects of BMI on cardiometabolic outcomes in pre- and post-menopausal women in the UKB |                      |                         |                      |                         |
|--------------------------------------------------------------------------------------------------------------------------|----------------------|-------------------------|----------------------|-------------------------|
| Trait                                                                                                                    | Pre-menopause        |                         | Post-menopause       |                         |
| CMDs                                                                                                                     | OR/ $\beta$ (95% CI) | p value                 | OR/ $\beta$ (95% CI) | p value                 |
| CAD                                                                                                                      | 2.2(1.16, 4.18)      | 0.02                    | 0.89(0.70, 1.14)     | 0.36                    |
| Type 2 diabetes                                                                                                          | 3.75(2.21, 6.36)     | 8.99 x10 <sup>-7</sup>  | 3.14(2.39, 4.13)     | 3.13x10 <sup>-16</sup>  |
| Stroke                                                                                                                   | 1.54(0.74, 3.2)      | 0.25                    | 0.84(0.60, 1.18)     | 0.32                    |
| CKD                                                                                                                      | 1.89(0.28, 12.87)    | 0.52                    | 0.82(0.32, 2.09)     | 0.67                    |
| Hypertension                                                                                                             | 2.11(1.71, 2.59)     | 1.74 x10 <sup>-12</sup> | 1.57(1.40, 1.76)     | 1.39 x10 <sup>-14</sup> |
| Biomarkers                                                                                                               |                      |                         |                      |                         |
| DBP                                                                                                                      | 0.23(0.13, 0.33)     | 3.73 x10 <sup>-6</sup>  | 0.15(0.08, 0.22)     | 1.89 x10 <sup>-5</sup>  |
| SBP                                                                                                                      | 0.19(0.1, 0.29)      | 8.15 x10 <sup>-5</sup>  | 0.04(-0.02, 0.11)    | 0.20                    |
| Glucose                                                                                                                  | 0.16(0.06, 0.26)     | 1.10 x10 <sup>-3</sup>  | 0.11(0.04, 0.18)     | 3.33 x10 <sup>-3</sup>  |
| HBA <sub>1c</sub>                                                                                                        | 0.29(0.19, 0.39)     | 1.38x10 <sup>-8</sup>   | 0.19(0.12, 0.27)     | 1.21 x10 <sup>-7</sup>  |
| Cholesterol                                                                                                              | -0.06(-0.15, 0.03)   | 0.18                    | -0.15(-0.22, -0.08)  | 2.31 x10 <sup>-5</sup>  |
| HDL                                                                                                                      | -0.32(-0.44, -0.21)  | 9.92 x10 <sup>-9</sup>  | -0.19(-0.27, -0.11)  | 1.55 x10 <sup>-6</sup>  |
| LDL                                                                                                                      | 0.03(-0.06, 0.12)    | 0.52                    | -0.07(-0.14, 0)      | 0.04                    |
| Triacylglycerol                                                                                                          | 0.22(0.12, 0.31)     | 7.99 x10 <sup>-6</sup>  | 0.06(-0.01, 0.13)    | 0.08                    |
| LPA                                                                                                                      | 0.01(-0.09, 0.11)    | 0.88                    | 0.06(-0.02, 0.14)    | 0.12                    |
| Urea                                                                                                                     | 0.08(-0.01, 0.18)    | 0.08                    | 0.06(-0.02, 0.13)    | 0.13                    |

Effect sizes for CMDs are represented as OR. Effect sizes for biomarkers are represented as  $\beta$  SD units

| ESM Table 8. Estimates of causal effect of BMI on main cardiometabolic diseases in different groups of men and women |                 |                       |                 |                        |                 |                        |                 |                |
|----------------------------------------------------------------------------------------------------------------------|-----------------|-----------------------|-----------------|------------------------|-----------------|------------------------|-----------------|----------------|
| Group                                                                                                                | CAD             |                       | T2D             |                        | Hypertension    |                        | Stroke          |                |
|                                                                                                                      | OR(95% CI)      | <i>p</i> value        | OR(95% CI)      | <i>p</i> value         | OR(95% CI)      | <i>p</i> value         | OR(95% CI)      | <i>p</i> value |
| All men                                                                                                              | 1.30(1.15,1.47) | 2.56x10 <sup>-5</sup> | 2.85(2.43,3.33) | 2.61x10 <sup>-38</sup> | 1.5(1.38,1.63)  | 1.49x10 <sup>-22</sup> | 1.14(0.92,1.4)  | 0.23           |
| All women                                                                                                            | 0.97(0.81,1.18) | 0.78                  | 3.51(2.84,4.33) | 2.99x10 <sup>-31</sup> | 1.55(1.42,1.7)  | 9.28x10 <sup>-23</sup> | 1(0.77,1.3)     | 0.98           |
| Pre-M women                                                                                                          | 2.20(1.16,4.18) | 1.58x10 <sup>-2</sup> | 3.75(2.21,6.36) | 8.99x10 <sup>-7</sup>  | 2.11(1.71,2.59) | 1.74x10 <sup>-12</sup> | 1.54(0.74,3.2)  | 0.25           |
| Post-M women                                                                                                         | 0.89(0.7,1.14)  | 0.36                  | 3.14(2.39,4.13) | 3.13x10 <sup>-16</sup> | 1.57(1.4,1.76)  | 1.39x10 <sup>-14</sup> | 0.84(0.6,1.18)  | 0.32           |
| Younger women (<55 years)                                                                                            | 1.47(0.95,2.28) | 8.65x10 <sup>-2</sup> | 4.31(2.98,6.25) | 1.10x10 <sup>-14</sup> | 1.73(1.49,2.02) | 1.34x10 <sup>-12</sup> | 1.28(0.78,2.09) | 0.34           |
| Older women (>=/>55 years)                                                                                           | 0.9(0.72,1.12)  | 0.35                  | 3.43(2.62,4.48) | 2.27x10 <sup>-19</sup> | 1.55(1.38,1.74) | 7.14x10 <sup>-14</sup> | 0.93(0.67,1.28) | 0.65           |
| Pre-M, premenopausal; Post-M, postmenopausal                                                                         |                 |                       |                 |                        |                 |                        |                 |                |

| ESM Table 9. Association between cardiometabolic traits and BMI (trait to BMI) |                           |         |         |
|--------------------------------------------------------------------------------|---------------------------|---------|---------|
| Trait                                                                          | method                    | $\beta$ | p value |
| CMDs                                                                           |                           |         |         |
| CAD                                                                            | Inverse variance weighted | 0.98    | 0.393   |
|                                                                                | Egger Intercept           | 1.01    | 0.349   |
| Type 2 diabetes                                                                | Inverse variance weighted | 0.95    | 0.059   |
|                                                                                | Egger Intercept           | 1.01    | 0.039   |
| Stroke                                                                         | Inverse variance weighted | 0.93    | 0.081   |
|                                                                                | Egger Intercept           | 1.00    | 0.956   |
| CKD                                                                            | Inverse variance weighted | 0.99    | 0.737   |
|                                                                                | Egger Intercept           | 1.02    | 0.276   |
| Hypertension                                                                   | NA*                       | 1.00    |         |
| Biomarkers                                                                     |                           |         |         |
| SBP                                                                            | Inverse variance weighted | 0.00    | 0.001   |
|                                                                                | Egger Intercept           | 0.00    | 0.285   |
| DBP                                                                            | Inverse variance weighted | -0.01   | 0.000   |
|                                                                                | Egger Intercept           | 0.00    | 0.033   |
| Glucose                                                                        | Inverse variance weighted | -0.11   | 0.219   |
|                                                                                | Egger Intercept           | 0.01    | 0.443   |
| HBA <sub>1c</sub>                                                              | Inverse variance weighted | -0.01   | 0.657   |
|                                                                                | Egger Intercept           | 0.00    | 0.050   |
| HDL                                                                            | Inverse variance weighted | -0.03   | 0.124   |
|                                                                                | Egger Intercept           | 0.00    | 0.002   |
| Triacylglycerol                                                                | Inverse variance weighted | -0.02   | 0.462   |
|                                                                                | Egger Intercept           | 0.00    | 0.166   |
| Urea                                                                           | Inverse variance weighted | 0.03    | 0.637   |
|                                                                                | Egger Intercept           | 0.01    | 0.196   |
| Cholesterol*                                                                   | Inverse variance weighted | -0.06   | 0.041   |
|                                                                                |                           |         |         |
| LPA                                                                            | NA <sup>A</sup>           |         |         |

<sup>A</sup>No SNPs remained after QC and harmonization. \*Below optimum number of instruments after QC and harmonization). CAD = coronary artery disease, CKD = chronic kidney disease, T2D = type 2 diabetes, HBA<sub>1c</sub> = glycated haemoglobin, LPA = lipoprotein(a), DBP = diastolic blood pressure, SBP = systolic blood pressure.

| ESM Table 10. Prevalence of CAD among obese and non-obese premenopausal women |     |       |           |
|-------------------------------------------------------------------------------|-----|-------|-----------|
| Obesity                                                                       | CAD | N     | Frequency |
| No                                                                            | No  | 36682 | 99.12 %   |
| No                                                                            | Yes | 327   | 0.88 %    |
| Yes                                                                           | No  | 8993  | 97.89 %   |
| Yes                                                                           | Yes | 194   | 2.11 %    |

## ESM Figures

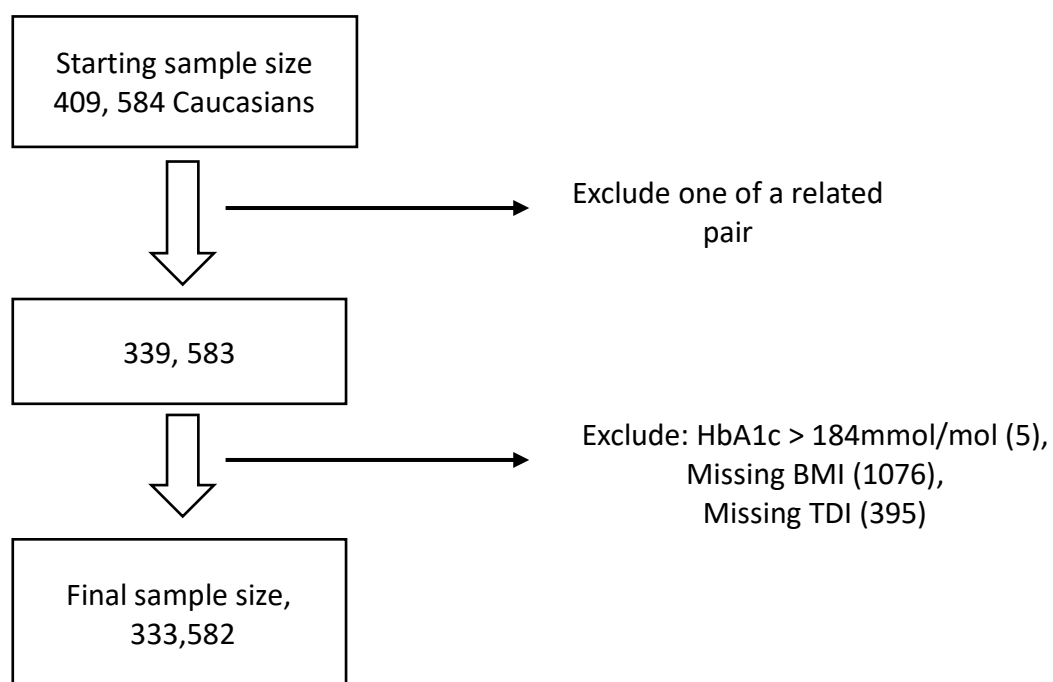

ESM Figure 1. Flow chart of final sample size ascertainment.

## Prevalence of main cardiometabolic diseases in men and women.

In this cohort, men had a higher burden of disease compared to women and this burden persisted across all age groups after the youngest group where prevalence was the same except for hypertension. With increase in age, the prevalence of CAD and T2D increased, the highest prevalence being in men. Figure 2 below shows plots depicting prevalence for CAD, T2D, hypertension and stroke, in different age groups.

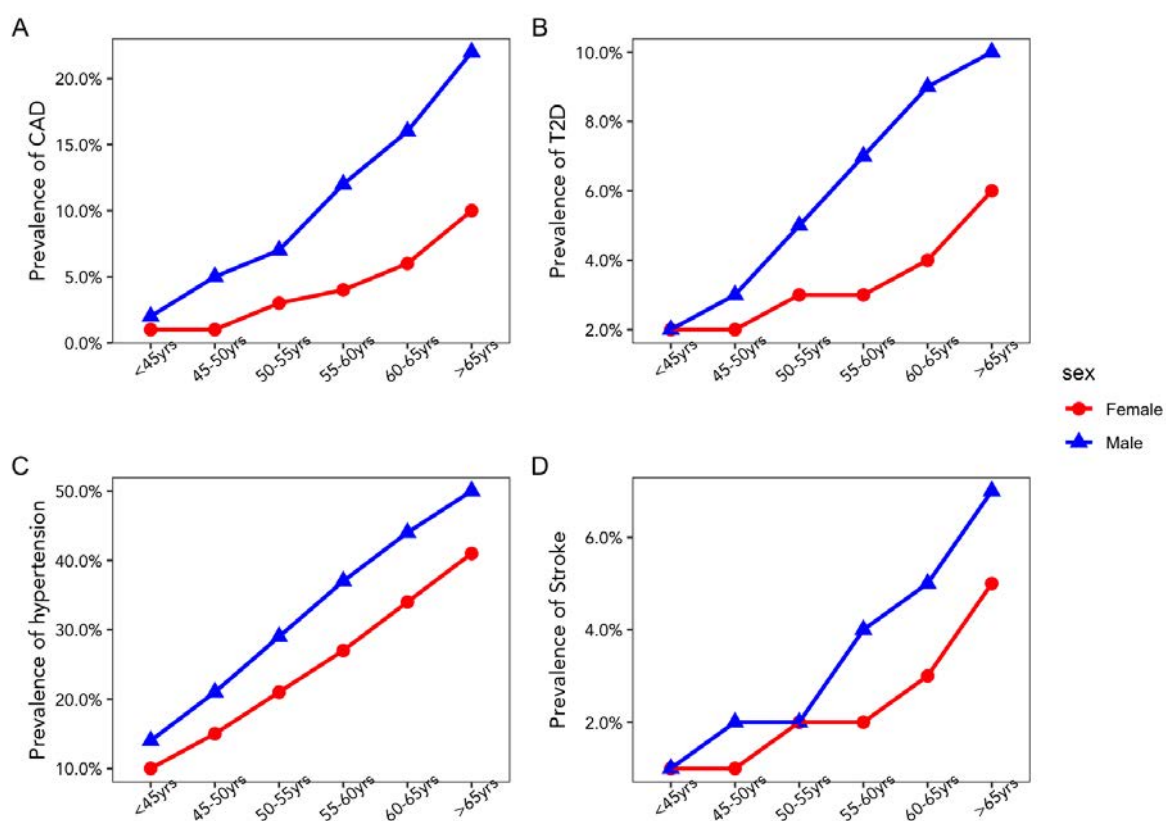

ESM Figure 2. Prevalence of main cardiometabolic diseases in men and women across different age groups in the UK Biobank.

### BMI across age groups in men and women.

Men had a higher BMI than women across all age groups. The prevalence rose sharply up to ages 50-55 years, after which it plateaued in women and seemed to reduce slightly in men in the subsequent higher age groups. Figure 3.

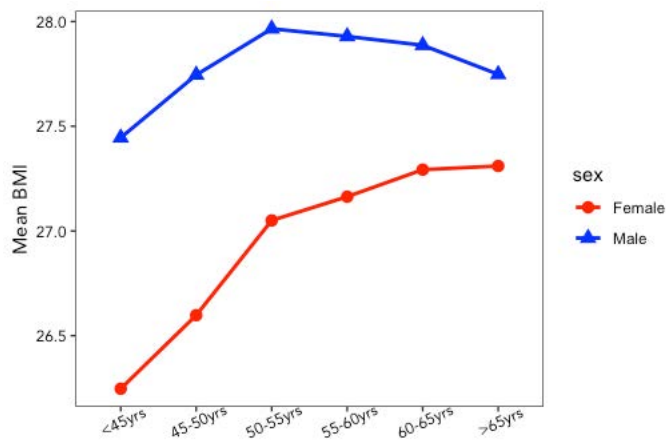

ESM Figure 3. Mean BMI (kg/m<sup>2</sup>) in men and women across different age groups in the UK Biobank.

**Sensitivity analysis: Adjusting for WHR, lipid-lowering medications and excluding outliers of BMI in each scenario.**

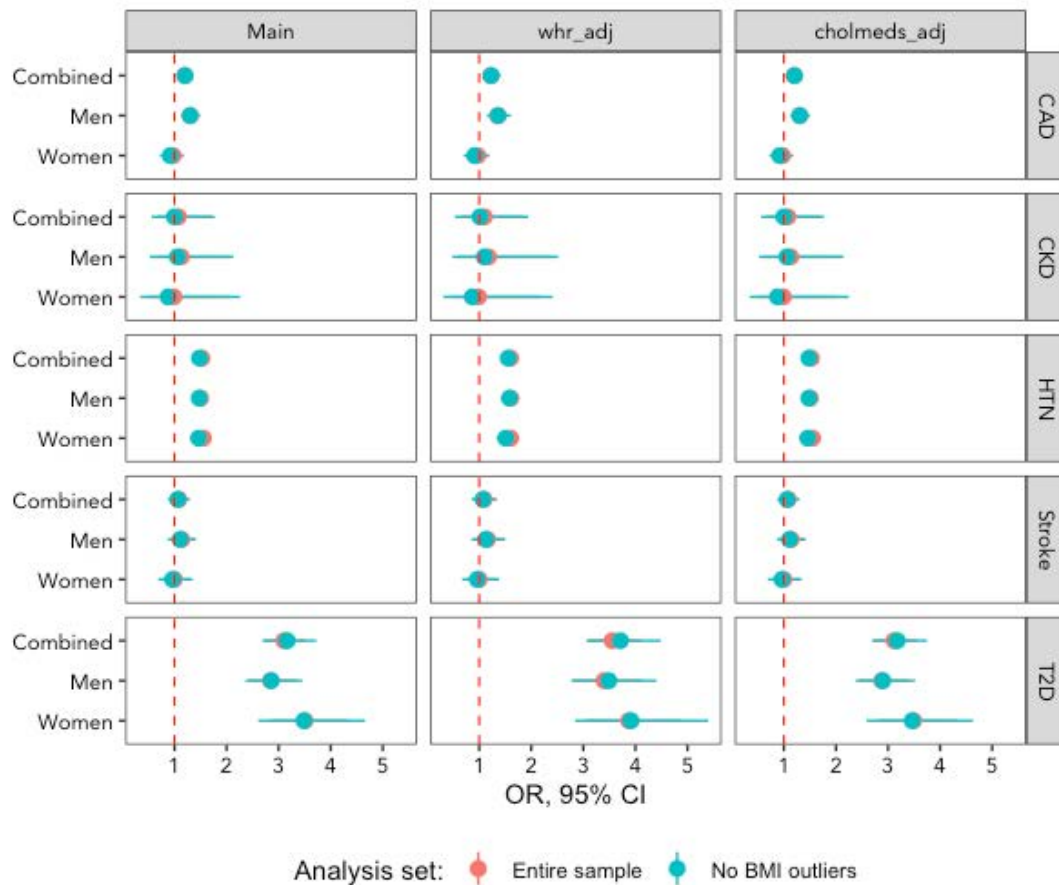

ESM Figure 4. Causal effect estimates of the effect of BMI on different cardiometabolic diseases, in men and women, comparing the main analysis with analyses accounting for waist-hip ratio (whr\_adj) and lipid-lowering medication (cholmeds\_adj) and also comparing the main dataset (red dots) and one excluding outliers of BMI (green dots) across all the adjustments. HTN = hypertension.

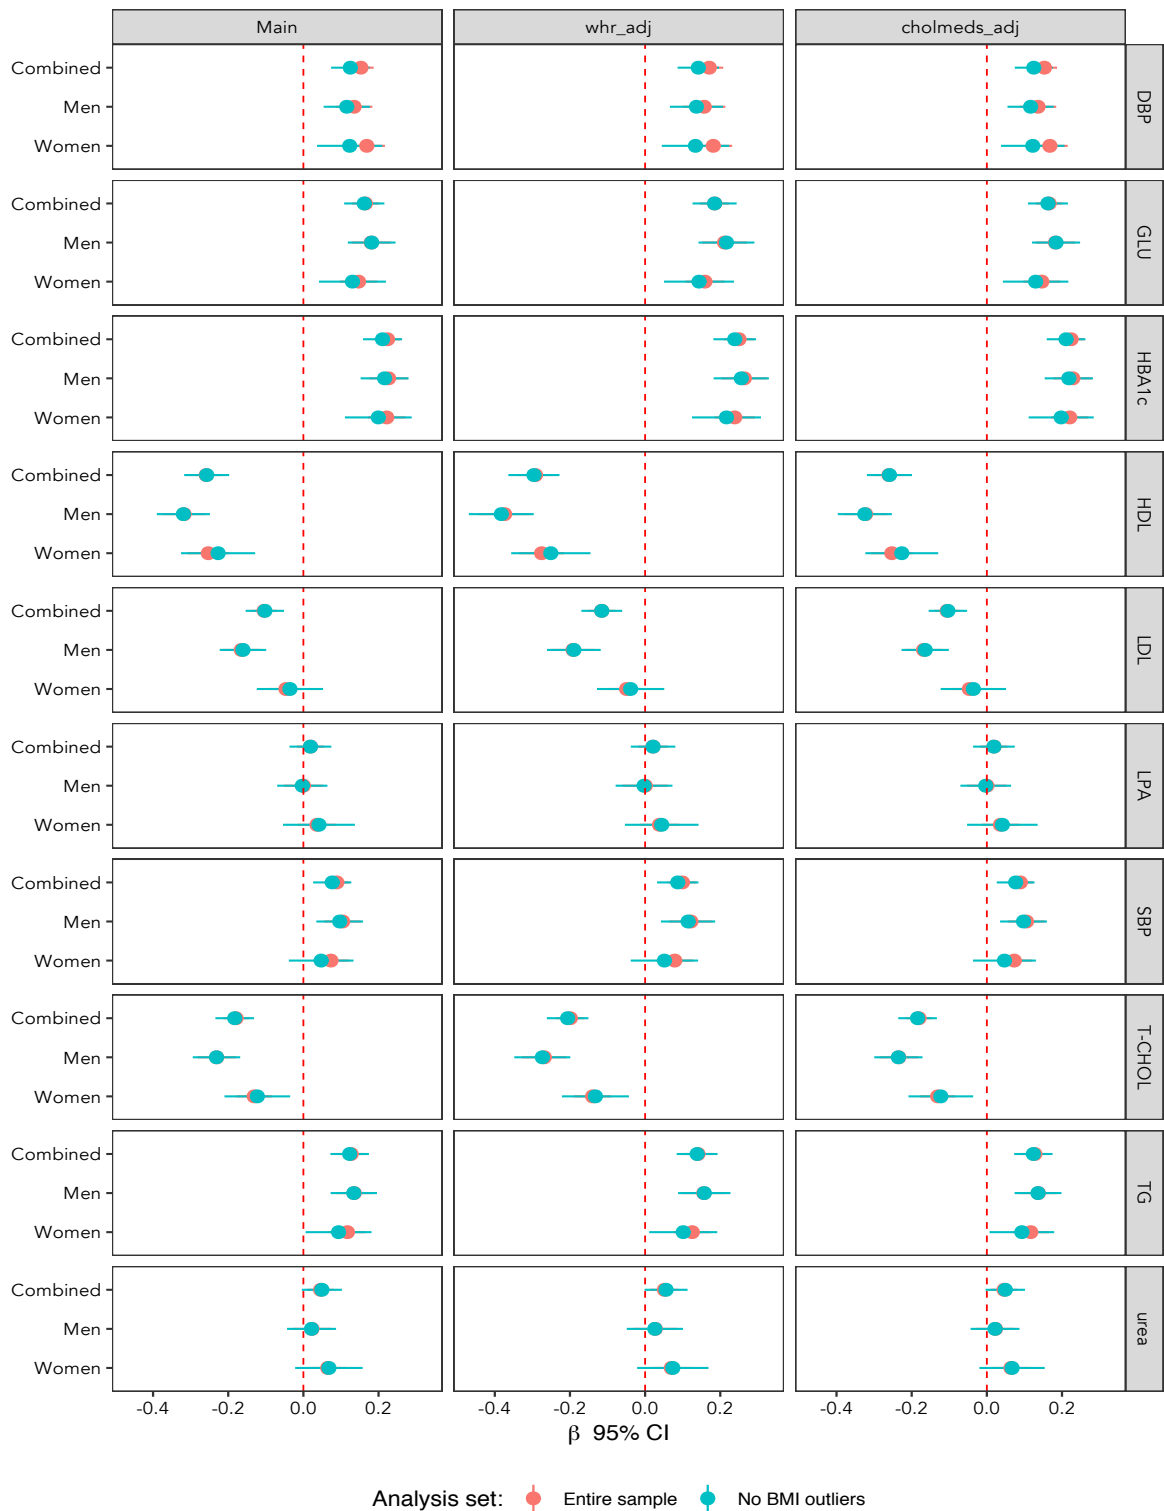

ESM Figure 5. Causal effect estimates of the effect of BMI on different cardiometabolic risk factors, in men and women, comparing the main analysis with analyses accounting for WHR (whr\_adj) and lipid-lowering medication (cholmed\_adj) and also comparing the main dataset (red dots) and one excluding outliers of BMI (green dots) across all the adjustments. T-CHOL = total cholesterol, GLU = glucose, TG = triacylglycerol, SBP = systolic blood pressure, DBP = diastolic blood pressure.



**Effect of menopause and age on the causal association between BMI and cardiometabolic disease.**

We performed analyses stratified by menopause status in women and by age in men and women and compared the results in the main disease outcomes. We excluded CKD because of the few case numbers which produced very wide confidence intervals and therefore unreliable results in these analyses.

BMI was associated with CAD in all age groups in men but in women the association was only observed in pre-menopausal women (self-reported). The association in younger women was positive but not significant. Association with stroke remained non-significant in all groups in men and women while associations with hypertension and T2D remained significant in all groups in men and women.

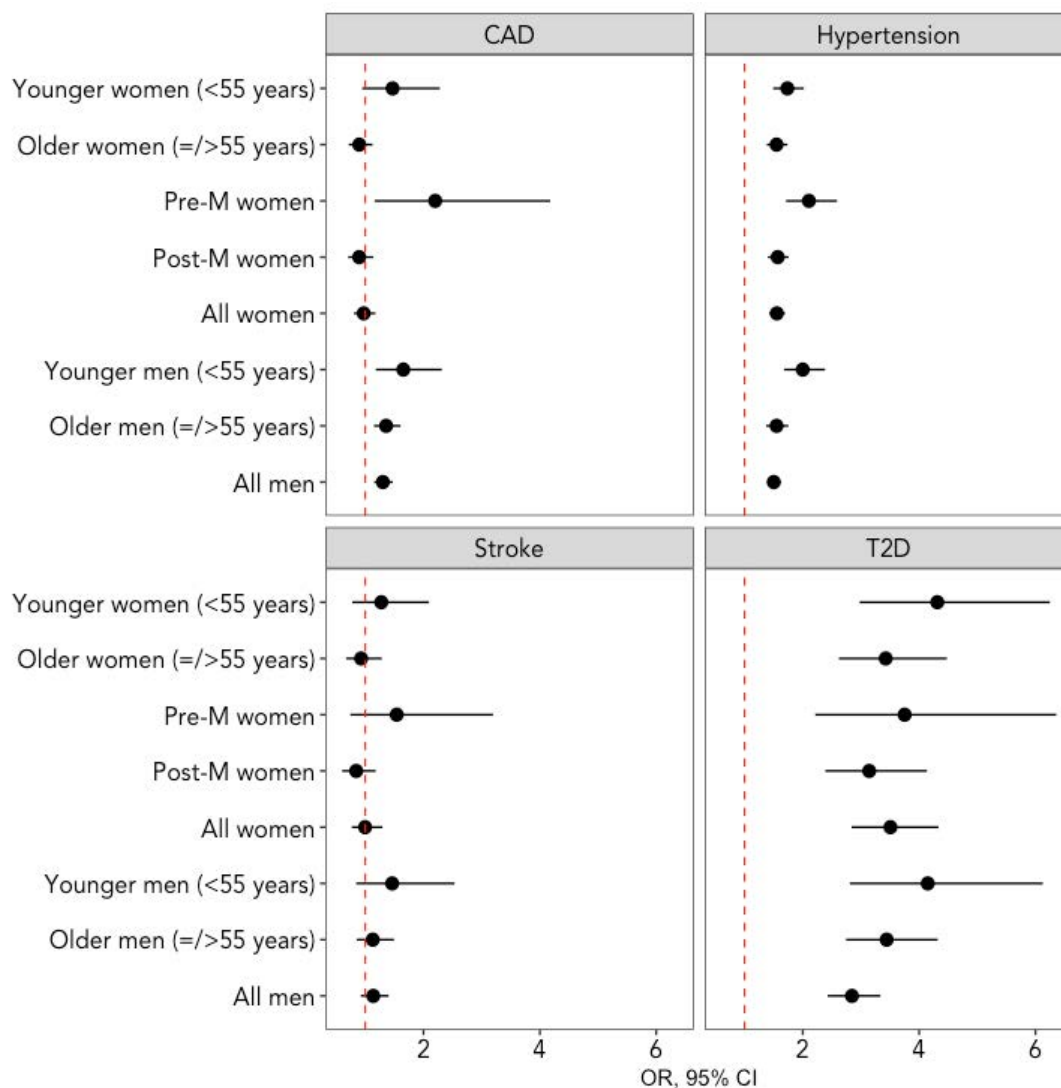

ESM Figure 6. Estimates of causal effect of BMI on main cardiometabolic diseases in different groups of men and women. Pre-M = premenopausal, Post-M = postmenopausal.

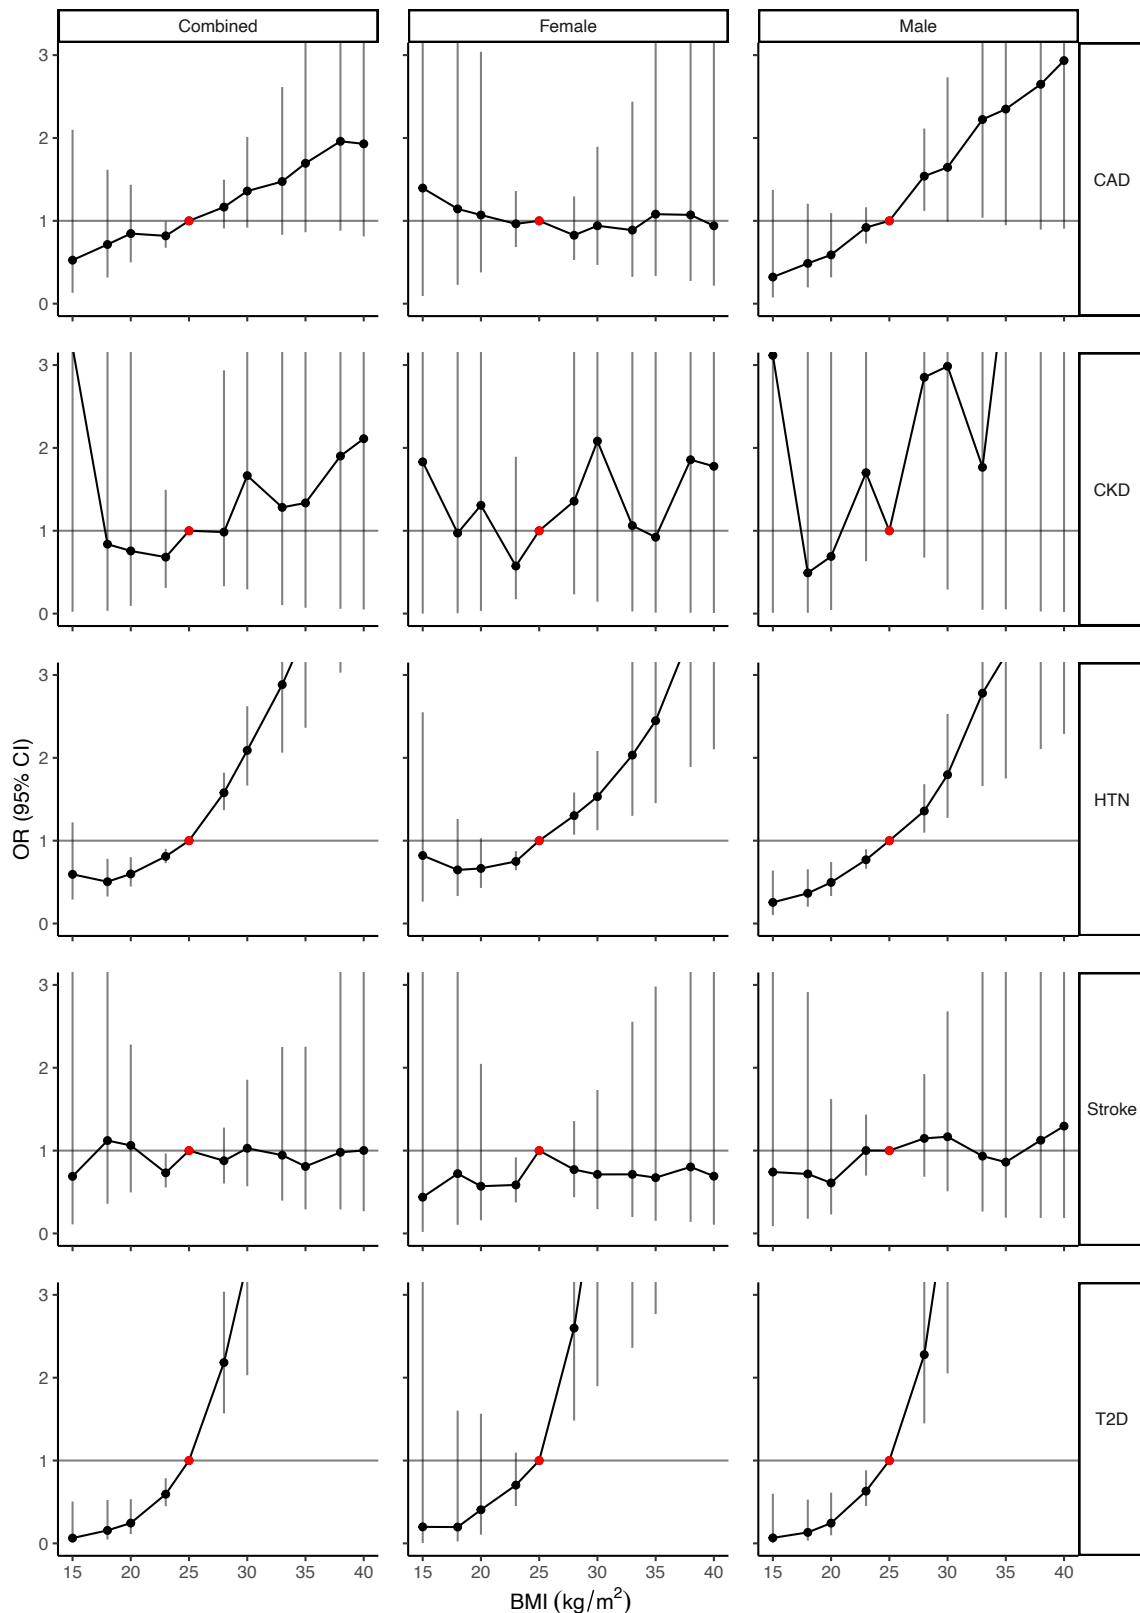

ESM Figure 7. Piecemeal MR plots of estimated causal relationships between BMI and cardiometabolic diseases in combined and sex-specific analyses. The red dot represents reference BMI of 25kg/m<sup>2</sup> and the grey horizontal line represents the null effect size. Black dots represent quantile point estimates based on the quantile mean and the vertical grey lines represent the 95% CI. The X and Y axes have been truncated at 40 and OR of 3 respectively for ease of comparison.
